# Supplementary material
Source: PubMed Central journal article supplement (PMC5862370)
Supplement: kxx026_supp.pdf [file kxx026_supp.pdf]

## Supplementary Material for “Simple fixed-effects inference for complex functional models”

SO YOUNG PARK\*, ANA-MARIA STAICU, LUO XIAO

*Department of Statistics, North Carolina State University, Raleigh, NC, USA*

spark13@ncsu.edu

CIPRIAN M. CRAINICEANU

*Department of Biostatistics, Johns Hopkins University, Baltimore, MD, USA*

[Section A](#) - [Section D](#) include additional simulation results on the performance of the pointwise and joint confidence bands. Specifically, [Section A](#) presents results for different nominal coverages 85% and 90% when confidence bands are obtained by bootstrapping subject-level residuals and the mean function  $\mu(t, x)$  is modeled nonparametrically. [Section B](#) presents results when confidence bands are obtained by bootstrapping subject-level residuals and the mean function  $\mu(t, x)$  is modeled parametrically. [Section C](#) presents results obtained by bootstrapping observations by subject; in all sections, nominal coverages of 85%, 90% and 95% are considered. [Section D](#) presents simulation results for the case of having non-Gaussian errors. Lastly, [Section E](#) includes the additional figures referenced in the main manuscript.

SECTION A. ADDITIONAL RESULTS OBTAINED BY BOOTSTRAPPING RESIDUALS BY SUBJECT  
WHEN A NONPARAMETRIC BIVARIATE FUNCTION IS FITTED FOR  $\mu(t, x)$

In practice one does not know the true model for the mean structure and thus nonparametric modeling is often preferable. Thus instead of assuming a correct parametric model for  $\mu(t, x)$ , we consider a completely nonparametric dependence of the mean response on  $t$  and  $X$ . For example, in the case of F2 i. (a) the generating mean model is  $\mu(t, x) = 5 + 2t + 3X$ , but the assumed fitting model is an unknown, smooth bivariate function of both  $t$  and  $X$ . The relevant results are presented in Tables S1-S2 for nominal coverages of 85% and 90%, respectively. The simulation data are generated as described in Section 6. We use the residual-based bootstrap. Both pointwise and joint confidence bands perform excellently for all three cases of true mean functions, and for all three nominal coverages we consider here.

Table S1. Simulation results for 85% confidence bands based on the bootstrap of subject-level residuals when a *nonparametric* bivariate function is fitted for  $\mu(t, x)$ ; results are based on 500 MC samples.

| Case | True Mean Function                                         | Parameter                       | $\rho$     | ACP <sup>point</sup> |          | AL <sup>point</sup> |          | ACP <sup>joint</sup> <sub><math>\mu(t,x)</math></sub> |        | AL <sup>joint</sup> <sub><math>\mu(t,x)</math></sub> |        |  |
|------|------------------------------------------------------------|---------------------------------|------------|----------------------|----------|---------------------|----------|-------------------------------------------------------|--------|------------------------------------------------------|--------|--|
| (a)  | $\beta_0 + \beta_1 t + \beta_x X + \tau Z$                 | $\mu(t, X) = 5 + 2t + 3X$       | 0.20       | 0.84                 | (< 0.01) | 1.22                | (0.01)   | 0.82                                                  | (0.02) | 2.85                                                 | (0.01) |  |
|      |                                                            |                                 | 0.90       | 0.83                 | (< 0.01) | 1.61                | (0.01)   | 0.81                                                  | (0.02) | 3.76                                                 | (0.01) |  |
|      |                                                            |                                 | $\tau = 8$ | 0.20                 | 0.84     | (0.02)              | 0.10     | (< 0.01)                                              |        |                                                      |        |  |
|      |                                                            |                                 | 0.90       | 0.84                 | (0.02)   | 0.10                | (< 0.01) |                                                       |        |                                                      |        |  |
| (b)  | $\beta_0 + \beta_1 t + \beta_x X + \beta_{tx} tX + \tau Z$ | $\mu(t, X) = 5 + 2t + 3X + 7tX$ | 0.20       | 0.84                 | (< 0.01) | 1.22                | (0.01)   | 0.82                                                  | (0.02) | 2.85                                                 | (0.01) |  |
|      |                                                            |                                 | 0.90       | 0.83                 | (< 0.01) | 1.61                | (0.01)   | 0.81                                                  | (0.02) | 3.76                                                 | (0.01) |  |
|      |                                                            |                                 | $\tau = 8$ | 0.20                 | 0.84     | (0.02)              | 0.10     | (< 0.01)                                              |        |                                                      |        |  |
|      |                                                            |                                 | 0.90       | 0.84                 | (0.02)   | 0.10                | (< 0.01) |                                                       |        |                                                      |        |  |
| (c)  | $\cos(2\pi t) + \beta_x X + \tau Z$                        | $\mu(t, X) = \cos(2\pi t) + 3X$ | 0.20       | 0.84                 | (< 0.01) | 1.22                | (0.01)   | 0.82                                                  | (0.02) | 2.86                                                 | (0.01) |  |
|      |                                                            |                                 | 0.90       | 0.83                 | (< 0.01) | 1.61                | (0.01)   | 0.81                                                  | (0.02) | 3.77                                                 | (0.01) |  |
|      |                                                            |                                 | $\tau = 8$ | 0.20                 | 0.84     | (0.02)              | 0.10     | (j 0.01)                                              |        |                                                      |        |  |
|      |                                                            |                                 | 0.90       | 0.84                 | (0.02)   | 0.10                | (j 0.01) |                                                       |        |                                                      |        |  |

Standard errors are presented in parentheses.

Table S2. Simulation results for 90% confidence bands based on the bootstrap of subject-level residuals when a *nonparametric* bivariate function is fitted for  $\mu(t, x)$ ; results are based on 500 MC samples.

| Case | True Mean Function                                         | Parameter                       | $\rho$     | ACP <sup>point</sup> |          | AL <sup>point</sup> |          | ACP <sup>joint</sup> <sub><math>\mu(t,x)</math></sub> |        | AL <sup>joint</sup> <sub><math>\mu(t,x)</math></sub> |        |  |
|------|------------------------------------------------------------|---------------------------------|------------|----------------------|----------|---------------------|----------|-------------------------------------------------------|--------|------------------------------------------------------|--------|--|
| (a)  | $\beta_0 + \beta_1 t + \beta_x X + \tau Z$                 | $\mu(t, X) = 5 + 2t + 3X$       | 0.20       | 0.89                 | (< 0.01) | 1.39                | (0.01)   | 0.87                                                  | (0.01) | 2.99                                                 | (0.01) |  |
|      |                                                            |                                 | 0.90       | 0.88                 | (< 0.01) | 1.83                | (0.02)   | 0.87                                                  | (0.02) | 3.95                                                 | (0.01) |  |
|      |                                                            |                                 | $\tau = 8$ | 0.20                 | 0.88     | (0.01)              | 0.12     | (< 0.01)                                              |        |                                                      |        |  |
|      |                                                            |                                 | 0.90       | 0.88                 | (0.01)   | 0.12                | (< 0.01) |                                                       |        |                                                      |        |  |
| (b)  | $\beta_0 + \beta_1 t + \beta_x X + \beta_{tx} tX + \tau Z$ | $\mu(t, X) = 5 + 2t + 3X + 7tX$ | 0.20       | 0.89                 | (< 0.01) | 1.39                | (0.01)   | 0.87                                                  | (0.01) | 2.99                                                 | (0.01) |  |
|      |                                                            |                                 | 0.90       | 0.88                 | (< 0.01) | 1.83                | (0.02)   | 0.87                                                  | (0.02) | 3.95                                                 | (0.01) |  |
|      |                                                            |                                 | $\tau = 8$ | 0.20                 | 0.88     | (0.01)              | 0.12     | (< 0.01)                                              |        |                                                      |        |  |
|      |                                                            |                                 | 0.90       | 0.88                 | (0.01)   | 0.12                | (< 0.01) |                                                       |        |                                                      |        |  |
| (c)  | $\cos(2\pi t) + \beta_x X + \tau Z$                        | $\mu(t, X) = \cos(2\pi t) + 3X$ | 0.20       | 0.89                 | (< 0.01) | 1.39                | (0.01)   | 0.88                                                  | (0.01) | 3.00                                                 | (0.01) |  |
|      |                                                            |                                 | 0.90       | 0.88                 | (< 0.01) | 1.84                | (0.02)   | 0.87                                                  | (0.02) | 3.96                                                 | (0.01) |  |
|      |                                                            |                                 | $\tau = 8$ | 0.20                 | 0.88     | (0.01)              | 0.12     | (< 0.01)                                              |        |                                                      |        |  |
|      |                                                            |                                 | 0.90       | 0.88                 | (0.01)   | 0.12                | (< 0.01) |                                                       |        |                                                      |        |  |

Standard errors are presented in parentheses.

SECTION B. RESULTS OBTAINED BY BOOTSTRAPPING RESIDUALS BY SUBJECT WHEN THE  
CORRECT MEAN STRUCTURE IS FITTED

Here we present the performance of the pointwise and joint confidence bands for different nominal coverages when the correct models are assumed. Estimation accuracy is measured using the bias and variance of the estimators; for univariate and bivariate smooths, single number summaries of these measures are used. Specifically, when the mean of interest is  $\mu(t) = \cos(2\pi t)$ , as in scenario F2 i.(c), the integrated bias defined by  $\int_0^1 \{\bar{\mu}(t) - \mu(t)\} dt$  is used as a summary measure of bias, and the integrated variance, defined by  $\int_0^1 \{\sum_{i_{sim}=1}^{N_{sim}} \{\hat{\mu}_{i_{sim}}(t) - \bar{\mu}(t)\}^2 / (N_{sim} - 1)\} dt$  is used as a summary measure of variance. Here  $\hat{\mu}_{i_{sim}}(t)$  denotes the mean estimator from one simulation,  $\bar{\mu}(t) = \sum_{i_{sim}=1}^{N_{sim}} \hat{\mu}_{i_{sim}}(t) / N_{sim}$  is the sample mean of the estimator  $\hat{\mu}(t)$ .

Tables S3, S4, and S5 show results for nominal coverage of 85%, 90% and 95% respectively. The pointwise confidence interval/bands for all nominal coverages perform fairly well while there are few cases where they fail to achieve their nominal coverages. For the joint confidence band, the 90% ones perform very well for all cases considered, whereas the 85% one fails to achieve the nominal coverage for some cases. In terms of average lengths, the confidence intervals/bands tend to be wider when there is stronger correlation.

Table S3. Simulation results for 85% confidence bands based on the bootstrap of subject-level residuals when the *correct* mean structure is fitted; results are based on 500 MC samples.

| Case             | True Mean Function                         | Parameter             | $\rho$                                                      | Bias          | $\sqrt{\text{var}}$ | ACP <sup>point</sup> | AL <sup>point</sup> | ACP <sup>joint</sup> <sub><math>\mu(t,X)</math></sub> | AL <sup>joint</sup> <sub><math>\mu(t,X)</math></sub> |  |  |
|------------------|--------------------------------------------|-----------------------|-------------------------------------------------------------|---------------|---------------------|----------------------|---------------------|-------------------------------------------------------|------------------------------------------------------|--|--|
| (a)              | $\beta_0 + \beta_t t + \beta_x X + \tau Z$ | $\beta_0 = 5$         | 0.20                                                        | 0.00          | 0.20                | 0.83 (0.02)          | 0.40 (< 0.01)       |                                                       |                                                      |  |  |
|                  |                                            |                       | 0.90                                                        | -0.01         | 0.27                | 0.84 (0.02)          | 0.52 (< 0.01)       |                                                       |                                                      |  |  |
|                  |                                            | $\beta_t = 2$         | 0.20                                                        | 0.01          | 0.40                | 0.83 (0.02)          | 0.78 (< 0.01)       |                                                       |                                                      |  |  |
|                  |                                            |                       | 0.90                                                        | 0.01          | 0.52                | 0.83 (0.02)          | 1.03 (< 0.01)       |                                                       |                                                      |  |  |
|                  |                                            | $\beta_x = 3$         | 0.20                                                        | 0.00          | 0.05                | 0.84 (0.02)          | 0.10 (< 0.01)       |                                                       |                                                      |  |  |
|                  |                                            |                       | 0.90                                                        | 0.00          | 0.05                | 0.84 (0.02)          | 0.10 (< 0.01)       |                                                       |                                                      |  |  |
|                  |                                            | $\tau = 8$            | 0.20                                                        | 0.00          | 0.05                | 0.84 (0.02)          | 0.10 (< 0.01)       |                                                       |                                                      |  |  |
|                  |                                            |                       | 0.90                                                        | 0.00          | 0.05                | 0.83 (0.02)          | 0.10 (< 0.01)       |                                                       |                                                      |  |  |
|                  |                                            | (b)                   | $\beta_0 + \beta_t t + \beta_x X + \beta_{tx} t X + \tau Z$ | $\beta_0 = 5$ | 0.20                | -0.01                | 0.39                | 0.84 (0.02)                                           | 0.77 (< 0.01)                                        |  |  |
|                  |                                            |                       |                                                             |               | 0.90                | -0.02                | 0.51                | 0.84 (0.02)                                           | 1.01 (< 0.01)                                        |  |  |
| $\beta_t = 2$    | 0.20                                       |                       |                                                             | 0.03          | 0.78                | 0.84 (0.02)          | 1.54 (0.01)         |                                                       |                                                      |  |  |
|                  | 0.90                                       |                       |                                                             | 0.04          | 1.02                | 0.84 (0.02)          | 2.01 (0.01)         |                                                       |                                                      |  |  |
| $\beta_x = 3$    | 0.20                                       |                       |                                                             | 0.02          | 0.67                | 0.84 (0.02)          | 1.33 (0.01)         |                                                       |                                                      |  |  |
|                  | 0.90                                       |                       |                                                             | 0.02          | 0.88                | 0.82 (0.02)          | 1.74 (0.01)         |                                                       |                                                      |  |  |
| $\beta_{tx} = 7$ | 0.20                                       |                       |                                                             | -0.04         | 1.33                | 0.83 (0.02)          | 2.65 (0.01)         |                                                       |                                                      |  |  |
|                  | 0.90                                       |                       |                                                             | -0.06         | 1.75                | 0.83 (0.02)          | 3.47 (0.01)         |                                                       |                                                      |  |  |
| $\tau = 8$       | 0.20                                       |                       |                                                             | 0.00          | 0.05                | 0.84 (0.02)          | 0.10 (< 0.01)       |                                                       |                                                      |  |  |
|                  | 0.90                                       |                       |                                                             | 0.00          | 0.05                | 0.83 (0.02)          | 0.10 (< 0.01)       |                                                       |                                                      |  |  |
| (c)              | $\cos(2\pi t) + \beta_x X + \tau Z$        | $f(t) = \cos(2\pi t)$ | 0.20                                                        | 0.00          | 0.25                | 0.83 (0.01)          | 0.49 (< 0.01)       | 0.81 (0.02)                                           | 0.77 (< 0.01)                                        |  |  |
|                  |                                            |                       | 0.90                                                        | 0.00          | 0.32                | 0.83 (0.01)          | 0.64 (< 0.01)       | 0.81 (0.02)                                           | 1.00 (< 0.01)                                        |  |  |
|                  |                                            | $\beta_x = 3$         | 0.20                                                        | 0.00          | 0.05                | 0.84 (0.02)          | 0.10 (< 0.01)       |                                                       |                                                      |  |  |
|                  |                                            |                       | 0.90                                                        | 0.00          | 0.05                | 0.84 (0.02)          | 0.10 (< 0.01)       |                                                       |                                                      |  |  |
|                  |                                            | $\tau = 8$            | 0.20                                                        | 0.00          | 0.05                | 0.84 (0.02)          | 0.10 (< 0.01)       |                                                       |                                                      |  |  |
|                  |                                            |                       | 0.90                                                        | 0.00          | 0.05                | 0.83 (0.02)          | 0.10 (< 0.01)       |                                                       |                                                      |  |  |
| (d)              | $\cos(2\pi t) + 4((X/4) - t)^3 + \tau Z$   | $\mu_4(t, X)$         | 0.20                                                        | 0.00          | 0.61                | 0.84 (< 0.01)        | 1.22 (0.01)         | 0.81 (0.02)                                           | 2.86 (0.01)                                          |  |  |
|                  |                                            |                       | 0.90                                                        | 0.00          | 0.81                | 0.83 (< 0.01)        | 1.61 (0.01)         | 0.80 (0.02)                                           | 3.77 (0.01)                                          |  |  |
|                  |                                            | $\tau = 8$            | 0.20                                                        | 0.00          | 0.05                | 0.84 (0.02)          | 0.10 (< 0.01)       |                                                       |                                                      |  |  |
|                  |                                            |                       | 0.90                                                        | 0.00          | 0.05                | 0.84 (0.02)          | 0.10 (< 0.01)       |                                                       |                                                      |  |  |

Standard errors are presented in parentheses.

Table S4. Simulation results for 90% confidence bands based on the bootstrap of subject-level residuals when the *correct* mean structure is fitted; results are based on 500 MC samples.

| Case             | True Mean Function                         | Parameter             | $\rho$                                                      | Bias          | $\sqrt{\text{var}}$ | ACP <sup>point</sup> | AL <sup>point</sup> | ACP <sup>joint</sup> <sub><math>\mu(t,X)</math></sub> | AL <sup>joint</sup> <sub><math>\mu(t,X)</math></sub> |  |  |
|------------------|--------------------------------------------|-----------------------|-------------------------------------------------------------|---------------|---------------------|----------------------|---------------------|-------------------------------------------------------|------------------------------------------------------|--|--|
| (a)              | $\beta_0 + \beta_t t + \beta_x X + \tau Z$ | $\beta_0 = 5$         | 0.20                                                        | 0.00          | 0.20                | 0.89 (0.01)          | 0.46 (< 0.01)       |                                                       |                                                      |  |  |
|                  |                                            |                       | 0.90                                                        | -0.01         | 0.27                | 0.89 (0.01)          | 0.59 (< 0.01)       |                                                       |                                                      |  |  |
|                  |                                            | $\beta_t = 2$         | 0.20                                                        | 0.01          | 0.40                | 0.89 (0.01)          | 0.89 (< 0.01)       |                                                       |                                                      |  |  |
|                  |                                            |                       | 0.90                                                        | 0.01          | 0.52                | 0.89 (0.01)          | 1.17 (< 0.01)       |                                                       |                                                      |  |  |
|                  |                                            | $\beta_x = 3$         | 0.20                                                        | 0.00          | 0.05                | 0.89 (0.01)          | 0.11 (< 0.01)       |                                                       |                                                      |  |  |
|                  |                                            |                       | 0.90                                                        | 0.00          | 0.05                | 0.89 (0.01)          | 0.12 (< 0.01)       |                                                       |                                                      |  |  |
|                  |                                            | $\tau = 8$            | 0.20                                                        | 0.00          | 0.05                | 0.90 (0.01)          | 0.12 (< 0.01)       |                                                       |                                                      |  |  |
|                  |                                            |                       | 0.90                                                        | 0.00          | 0.05                | 0.89 (0.01)          | 0.12 (< 0.01)       |                                                       |                                                      |  |  |
|                  |                                            | (b)                   | $\beta_0 + \beta_t t + \beta_x X + \beta_{tx} t X + \tau Z$ | $\beta_0 = 5$ | 0.20                | -0.01                | 0.39                | 0.89 (0.01)                                           | 0.88 (< 0.01)                                        |  |  |
|                  |                                            |                       |                                                             |               | 0.90                | -0.02                | 0.51                | 0.87 (0.01)                                           | 1.15 (0.01)                                          |  |  |
| $\beta_t = 2$    | 0.20                                       |                       |                                                             | 0.03          | 0.78                | 0.89 (0.01)          | 1.75 (0.01)         |                                                       |                                                      |  |  |
|                  | 0.90                                       |                       |                                                             | 0.04          | 1.02                | 0.88 (0.01)          | 2.30 (0.01)         |                                                       |                                                      |  |  |
| $\beta_x = 3$    | 0.20                                       |                       |                                                             | 0.02          | 0.67                | 0.88 (0.01)          | 1.52 (0.01)         |                                                       |                                                      |  |  |
|                  | 0.90                                       |                       |                                                             | 0.02          | 0.88                | 0.87 (0.01)          | 1.98 (0.01)         |                                                       |                                                      |  |  |
| $\beta_{tx} = 7$ | 0.20                                       |                       |                                                             | -0.04         | 1.33                | 0.88 (0.01)          | 3.03 (0.01)         |                                                       |                                                      |  |  |
|                  | 0.90                                       |                       |                                                             | -0.06         | 1.75                | 0.87 (0.01)          | 3.96 (0.02)         |                                                       |                                                      |  |  |
| $\tau = 8$       | 0.20                                       |                       |                                                             | 0.00          | 0.05                | 0.9 (0.01)           | 0.12 (< 0.01)       |                                                       |                                                      |  |  |
|                  | 0.90                                       |                       |                                                             | 0.00          | 0.05                | 0.89 (0.01)          | 0.12 (< 0.01)       |                                                       |                                                      |  |  |
| (c)              | $\cos(2\pi t) + \beta_x X + \tau Z$        | $f(t) = \cos(2\pi t)$ | 0.20                                                        | 0.00          | 0.25                | 0.88 (0.01)          | 0.56 (< 0.01)       | 0.87 (0.02)                                           | 0.84 (< 0.01)                                        |  |  |
|                  |                                            |                       | 0.90                                                        | 0.00          | 0.32                | 0.88 (0.01)          | 0.73 (< 0.01)       | 0.87 (0.01)                                           | 1.09 (< 0.01)                                        |  |  |
|                  |                                            | $\beta_x = 3$         | 0.20                                                        | 0.00          | 0.05                | 0.89 (0.01)          | 0.11 (< 0.01)       |                                                       |                                                      |  |  |
|                  |                                            |                       | 0.90                                                        | 0.00          | 0.05                | 0.89 (0.01)          | 0.12 (< 0.01)       |                                                       |                                                      |  |  |
|                  |                                            | $\tau = 8$            | 0.20                                                        | 0.00          | 0.05                | 0.90 (0.01)          | 0.12 (< 0.01)       |                                                       |                                                      |  |  |
|                  |                                            |                       | 0.90                                                        | 0.00          | 0.05                | 0.89 (0.01)          | 0.12 (< 0.01)       |                                                       |                                                      |  |  |
| (d)              | $\cos(2\pi t) + 4((X/4) - t)^3 + \tau Z$   | $\mu_4(t, X)$         | 0.20                                                        | 0.00          | 0.61                | 0.89 (< 0.01)        | 1.40 (0.01)         | 0.87 (0.01)                                           | 3.01 (0.01)                                          |  |  |
|                  |                                            |                       | 0.90                                                        | 0.00          | 0.81                | 0.88 (< 0.01)        | 1.84 (0.02)         | 0.86 (0.02)                                           | 3.96 (0.01)                                          |  |  |
|                  |                                            | $\tau = 8$            | 0.20                                                        | 0.00          | 0.05                | 0.88 (0.01)          | 0.12 (< 0.01)       |                                                       |                                                      |  |  |
|                  |                                            |                       | 0.90                                                        | 0.00          | 0.05                | 0.88 (0.01)          | 0.12 (< 0.01)       |                                                       |                                                      |  |  |

Standard errors are presented in parentheses.

Table S5. Simulation results for 95% confidence bands based on the bootstrap of subject-level residuals when the *correct* mean structure is fitted; results are based on 500 MC samples.

| Case             | True Mean Function                         | Parameter             | $\rho$                                                      | Bias          | $\sqrt{\text{var}}$ | ACP <sup>point</sup> |         | AL <sup>point</sup> | ACP <sup>joint</sup> <sub><math>\mu(t, X)</math></sub> |      | AL <sup>joint</sup> <sub><math>\mu(t, X)</math></sub> |  |  |
|------------------|--------------------------------------------|-----------------------|-------------------------------------------------------------|---------------|---------------------|----------------------|---------|---------------------|--------------------------------------------------------|------|-------------------------------------------------------|--|--|
| (a)              | $\beta_0 + \beta_t t + \beta_x X + \tau Z$ | $\beta_0 = 5$         | 0.20                                                        | 0.00          | 0.20                | 0.94                 | (0.01)  | 0.54                | <(0.01)                                                |      |                                                       |  |  |
|                  |                                            |                       | 0.90                                                        | -0.01         | 0.27                | 0.94                 | (0.01)  | 0.70                | <(0.01)                                                |      |                                                       |  |  |
|                  |                                            | $\beta_t = 2$         | 0.20                                                        | 0.01          | 0.40                | 0.94                 | (0.01)  | 1.06                | <(0.01)                                                |      |                                                       |  |  |
|                  |                                            |                       | 0.90                                                        | 0.01          | 0.52                | 0.94                 | (0.01)  | 1.39                | (0.01)                                                 |      |                                                       |  |  |
|                  |                                            | $\beta_x = 3$         | 0.20                                                        | 0.00          | 0.05                | 0.95                 | (0.01)  | 0.14                | <(0.01)                                                |      |                                                       |  |  |
|                  |                                            |                       | 0.90                                                        | 0.00          | 0.05                | 0.95                 | (0.01)  | 0.14                | <(0.01)                                                |      |                                                       |  |  |
|                  |                                            | $\tau = 8$            | 0.20                                                        | 0.00          | 0.05                | 0.93                 | (0.01)  | 0.14                | <(0.01)                                                |      |                                                       |  |  |
|                  |                                            |                       | 0.90                                                        | 0.00          | 0.05                | 0.93                 | (0.01)  | 0.14                | <(0.01)                                                |      |                                                       |  |  |
|                  |                                            | (b)                   | $\beta_0 + \beta_t t + \beta_x X + \beta_{tx} t X + \tau Z$ | $\beta_0 = 5$ | 0.20                | -0.01                | 0.39    | 0.93                | (0.01)                                                 | 1.04 | <(0.01)                                               |  |  |
|                  |                                            |                       |                                                             |               | 0.90                | -0.02                | 0.51    | 0.94                | (0.01)                                                 | 1.36 | (0.01)                                                |  |  |
| $\beta_t = 2$    | 0.20                                       |                       |                                                             | 0.03          | 0.78                | 0.93                 | (0.01)  | 2.07                | (0.01)                                                 |      |                                                       |  |  |
|                  | 0.90                                       |                       |                                                             | 0.04          | 1.02                | 0.94                 | (0.01)  | 2.72                | (0.01)                                                 |      |                                                       |  |  |
| $\beta_x = 3$    | 0.20                                       |                       |                                                             | 0.02          | 0.67                | 0.93                 | (0.01)  | 1.08                | (0.01)                                                 |      |                                                       |  |  |
|                  | 0.90                                       |                       |                                                             | 0.02          | 0.88                | 0.93                 | (0.01)  | 2.36                | (0.01)                                                 |      |                                                       |  |  |
| $\beta_{tx} = 7$ | 0.20                                       |                       |                                                             | -0.04         | 1.33                | 0.92                 | (0.01)  | 3.60                | (0.02)                                                 |      |                                                       |  |  |
|                  | 0.90                                       |                       |                                                             | -0.06         | 1.75                | 0.93                 | (0.01)  | 4.71                | (0.02)                                                 |      |                                                       |  |  |
| $\tau = 8$       | 0.20                                       |                       |                                                             | 0.00          | 0.05                | 0.93                 | (0.01)  | 0.14                | <(0.01)                                                |      |                                                       |  |  |
|                  | 0.90                                       |                       |                                                             | 0.00          | 0.05                | 0.93                 | (0.01)  | 0.14                | <(0.01)                                                |      |                                                       |  |  |
| (c)              | $\cos(2\pi t) + \beta_x X + \tau Z$        | $f(t) = \cos(2\pi t)$ | 0.20                                                        | 0.00          | 0.25                | 0.93                 | (0.01)  | 0.67                | <(0.01)                                                |      | 0.92 (0.01) 0.95 (<0.01)                              |  |  |
|                  |                                            |                       | 0.90                                                        | 0.00          | 0.32                | 0.93                 | (0.01)  | 0.87                | <(0.01)                                                |      | 0.93 (0.01) 1.23 (<0.01)                              |  |  |
|                  |                                            | $\beta_x = 3$         | 0.20                                                        | 0.00          | 0.05                | 0.95                 | (0.01)  | 0.14                | <(0.01)                                                |      |                                                       |  |  |
|                  |                                            |                       | 0.90                                                        | 0.00          | 0.05                | 0.95                 | (0.01)  | 0.14                | <(0.01)                                                |      |                                                       |  |  |
|                  |                                            | $\tau = 8$            | 0.20                                                        | 0.00          | 0.05                | 0.93                 | (0.01)  | 0.14                | <(0.01)                                                |      |                                                       |  |  |
|                  |                                            |                       | 0.90                                                        | 0.00          | 0.05                | 0.93                 | (0.01)  | 0.14                | <(0.01)                                                |      |                                                       |  |  |
| (d)              | $\cos(2\pi t) + 4((X/4) - t)^3 + \tau Z$   | $\mu_4(t, X)$         | 0.20                                                        | 0.00          | 0.61                | 0.94                 | <(0.01) | 1.65                | (0.01)                                                 |      | 0.93 (0.01) 3.23 (0.01)                               |  |  |
|                  |                                            |                       | 0.90                                                        | 0.00          | 0.81                | 0.94                 | <(0.01) | 2.18                | (0.02)                                                 |      | 0.93 (0.01) 4.26 (0.01)                               |  |  |
|                  |                                            | $\tau = 8$            | 0.20                                                        | 0.00          | 0.05                | 0.93                 | (0.01)  | 0.14                | <(0.01)                                                |      |                                                       |  |  |
|                  |                                            |                       | 0.90                                                        | 0.00          | 0.05                | 0.94                 | (0.01)  | 0.14                | <(0.01)                                                |      |                                                       |  |  |

Standard errors are presented in parentheses.

SECTION C. RESULTS OBTAINED BY BOOTSTRAPPING OBSERVATIONS BY SUBJECT WHEN THE  
CORRECT MEAN STRUCTURE IS FITTED

Here we investigate the performance of pointwise and joint confidence interval/bands when they are obtained by bootstrapping subject-level observations (Algorithm 1) instead of bootstrapping subject-level residuals (Algorithm 2). Tables S6 - S8 present the relevant results for nominal coverages of 85%, 90% and 95% respectively.

First focus the case when the effect of covariate  $X$  is linear on the mean response (cases F2 i. (a)-(c)). Consider the setting described in Section 6 of the main manuscript, and recall that for each subject a single scalar covariate of interest  $X_i$  is observed. The simulation results confirm that bootstrapping subject-level observations instead of residuals has no effect on the performance of pointwise and joint confidence interval/bands, and overall they perform well. However, for the case of smooth effect of  $X$ , the result for the joint confidence band obtained by bootstrapping subject-level observations show substantial under-coverage. We suspect that it is because our covariate  $X$  is subject-specific, i.e.  $X_i$  is time-invariant; With  $n = 100$  subjects in our MC samples, there are only 100  $X_i$ -values to resample from. To confirm our speculation, we consider time-varying covariate (i.e.  $X_{ij}$  instead of  $X_i$ ). The results are presented in Table S9, and the empirical coverages are similar to ones obtained with the residual-based bootstrap.

Table S6. Simulation results for 85% confidence bands based on the bootstrap of subject-level observations when the *correct* mean structure is fitted; results are based on 500 MC samples.

| Case             | True Mean Function                         | Parameter             | $\rho$                                                      | Bias          | $\sqrt{\text{var}}$ | ACP <sup>point</sup> | AL <sup>point</sup> | ACP <sub><math>\mu(t,X)</math></sub> <sup>joint</sup> | AL <sub><math>\mu(t,X)</math></sub> <sup>joint</sup> |  |  |
|------------------|--------------------------------------------|-----------------------|-------------------------------------------------------------|---------------|---------------------|----------------------|---------------------|-------------------------------------------------------|------------------------------------------------------|--|--|
| (a)              | $\beta_0 + \beta_t t + \beta_x X + \tau Z$ | $\beta_0 = 5$         | 0.20                                                        | 0.00          | 0.20                | 0.83 (0.02)          | 0.40 (< 0.01)       |                                                       |                                                      |  |  |
|                  |                                            |                       | 0.90                                                        | -0.01         | 0.27                | 0.84 (0.02)          | 0.52 (< 0.01)       |                                                       |                                                      |  |  |
|                  |                                            | $\beta_t = 2$         | 0.20                                                        | 0.01          | 0.40                | 0.83 (0.02)          | 0.78 (< 0.01)       |                                                       |                                                      |  |  |
|                  |                                            |                       | 0.90                                                        | 0.01          | 0.52                | 0.83 (0.02)          | 1.03 (< 0.01)       |                                                       |                                                      |  |  |
|                  |                                            | $\beta_x = 3$         | 0.20                                                        | 0.00          | 0.05                | 0.85 (0.02)          | 0.10 (< 0.01)       |                                                       |                                                      |  |  |
|                  |                                            |                       | 0.90                                                        | 0.00          | 0.05                | 0.84 (0.02)          | 0.10 (< 0.01)       |                                                       |                                                      |  |  |
|                  |                                            | $\tau = 8$            | 0.20                                                        | 0.00          | 0.05                | 0.83 (0.02)          | 0.10 (< 0.01)       |                                                       |                                                      |  |  |
|                  |                                            |                       | 0.90                                                        | 0.00          | 0.05                | 0.83 (0.02)          | 0.11 (< 0.01)       |                                                       |                                                      |  |  |
|                  |                                            | (b)                   | $\beta_0 + \beta_t t + \beta_x X + \beta_{tx} t X + \tau Z$ | $\beta_0 = 5$ | 0.20                | -0.01                | 0.39                | 0.83 (0.02)                                           | 0.77 (< 0.01)                                        |  |  |
|                  |                                            |                       |                                                             |               | 0.90                | -0.02                | 0.51                | 0.84 (0.02)                                           | 1.01 (0.01)                                          |  |  |
| $\beta_t = 2$    | 0.20                                       |                       |                                                             | 0.03          | 0.78                | 0.83 (0.02)          | 1.54 (0.01)         |                                                       |                                                      |  |  |
|                  | 0.90                                       |                       |                                                             | 0.04          | 1.02                | 0.84 (0.02)          | 2.02 (0.01)         |                                                       |                                                      |  |  |
| $\beta_x = 3$    | 0.20                                       |                       |                                                             | 0.02          | 0.67                | 0.84 (0.02)          | 1.33 (0.01)         |                                                       |                                                      |  |  |
|                  | 0.90                                       |                       |                                                             | 0.03          | 0.88                | 0.83 (0.02)          | 1.75 (0.01)         |                                                       |                                                      |  |  |
| $\beta_{tx} = 7$ | 0.20                                       |                       |                                                             | -0.04         | 1.34                | 0.84 (0.02)          | 2.66 (0.01)         |                                                       |                                                      |  |  |
|                  | 0.90                                       |                       |                                                             | -0.06         | 1.75                | 0.84 (0.02)          | 3.48 (0.02)         |                                                       |                                                      |  |  |
| $\tau = 8$       | 0.20                                       |                       |                                                             | 0.00          | 0.05                | 0.83 (0.02)          | 0.10 (< 0.01)       |                                                       |                                                      |  |  |
|                  | 0.90                                       |                       |                                                             | 0.00          | 0.05                | 0.83 (0.02)          | 0.11 (< 0.01)       |                                                       |                                                      |  |  |
| (c)              | $\cos(2\pi t) + \beta_x X + \tau Z$        | $f(t) = \cos(2\pi t)$ | 0.20                                                        | 0.00          | 0.25                | 0.83 (0.01)          | 0.49 (< 0.01)       | 0.81 (0.02)                                           | 0.77 (< 0.01)                                        |  |  |
|                  |                                            |                       | 0.90                                                        | 0.00          | 0.32                | 0.83 (0.01)          | 0.64 (< 0.01)       | 0.81 (0.02)                                           | 1.00 (< 0.01)                                        |  |  |
|                  |                                            | $\beta_x = 3$         | 0.20                                                        | 0.00          | 0.05                | 0.85 (0.02)          | 0.10 (< 0.01)       |                                                       |                                                      |  |  |
|                  |                                            |                       | 0.90                                                        | 0.00          | 0.05                | 0.84 (0.02)          | 0.10 (< 0.01)       |                                                       |                                                      |  |  |
|                  |                                            | $\tau = 8$            | 0.20                                                        | 0.00          | 0.05                | 0.83 (0.02)          | 0.10 (< 0.01)       |                                                       |                                                      |  |  |
|                  |                                            |                       | 0.90                                                        | 0.00          | 0.05                | 0.83 (0.02)          | 0.11 (< 0.01)       |                                                       |                                                      |  |  |
| (d)              | $\cos(2\pi t) + 4((X/4) - t)^3 + \tau Z$   | $\mu_4(t, X)$         | 0.20                                                        | 0.00          | 0.64                | 0.82 (< 0.01)        | 1.25 (0.01)         | 0.74 (0.02)                                           | 3.00 (0.01)                                          |  |  |
|                  |                                            |                       | 0.90                                                        | 0.00          | 0.84                | 0.82 (< 0.01)        | 1.65 (0.01)         | 0.76 (0.02)                                           | 3.96 (0.01)                                          |  |  |
|                  |                                            | $\tau = 8$            | 0.20                                                        | 0.00          | 0.05                | 0.85 (0.02)          | 0.11 (< 0.01)       |                                                       |                                                      |  |  |
|                  |                                            |                       | 0.90                                                        | 0.00          | 0.05                | 0.83 (0.02)          | 0.11 (< 0.01)       |                                                       |                                                      |  |  |

Standard errors are presented in parentheses.

Table S7. Simulation results for 90% confidence bands based on the bootstrap of subject-level observations when the *correct* mean structure is fitted; results are based on 500 MC samples.

| Case             | True Mean Function                         | Parameter             | $\rho$                                                      | Bias          | $\sqrt{\text{var}}$ | ACP <sup>point</sup> | AL <sup>point</sup> | ACP <sub><math>\mu(t,X)</math></sub> <sup>joint</sup> | AL <sub><math>\mu(t,X)</math></sub> <sup>joint</sup> |  |  |
|------------------|--------------------------------------------|-----------------------|-------------------------------------------------------------|---------------|---------------------|----------------------|---------------------|-------------------------------------------------------|------------------------------------------------------|--|--|
| (a)              | $\beta_0 + \beta_t t + \beta_x X + \tau Z$ | $\beta_0 = 5$         | 0.20                                                        | 0.00          | 0.20                | 0.88 (0.01)          | 0.46 (< 0.01)       |                                                       |                                                      |  |  |
|                  |                                            |                       | 0.90                                                        | -0.01         | 0.27                | 0.88 (0.01)          | 0.59 (< 0.01)       |                                                       |                                                      |  |  |
|                  |                                            | $\beta_t = 2$         | 0.20                                                        | 0.01          | 0.40                | 0.89 (0.01)          | 0.89 (< 0.01)       |                                                       |                                                      |  |  |
|                  |                                            |                       | 0.90                                                        | 0.01          | 0.52                | 0.89 (0.01)          | 1.17 (< 0.01)       |                                                       |                                                      |  |  |
|                  |                                            | $\beta_x = 3$         | 0.20                                                        | 0.00          | 0.05                | 0.88 (0.01)          | 0.12 (< 0.01)       |                                                       |                                                      |  |  |
|                  |                                            |                       | 0.90                                                        | 0.00          | 0.05                | 0.89 (0.01)          | 0.12 (< 0.01)       |                                                       |                                                      |  |  |
|                  |                                            | $\tau = 8$            | 0.20                                                        | 0.00          | 0.05                | 0.88 (0.01)          | 0.12 (< 0.01)       |                                                       |                                                      |  |  |
|                  |                                            |                       | 0.90                                                        | 0.00          | 0.05                | 0.88 (0.01)          | 0.12 (< 0.01)       |                                                       |                                                      |  |  |
|                  |                                            | (b)                   | $\beta_0 + \beta_t t + \beta_x X + \beta_{tx} t X + \tau Z$ | $\beta_0 = 5$ | 0.20                | -0.01                | 0.39                | 0.88 (0.01)                                           | 0.88 (0.01)                                          |  |  |
|                  |                                            |                       |                                                             |               | 0.90                | -0.02                | 0.51                | 0.87 (0.01)                                           | 1.16 (0.01)                                          |  |  |
| $\beta_t = 2$    | 0.20                                       |                       |                                                             | 0.03          | 0.78                | 0.88 (0.01)          | 1.75 (0.01)         |                                                       |                                                      |  |  |
|                  | 0.90                                       |                       |                                                             | 0.04          | 1.02                | 0.89 (0.01)          | 2.30 (0.01)         |                                                       |                                                      |  |  |
| $\beta_x = 3$    | 0.20                                       |                       |                                                             | 0.02          | 0.67                | 0.88 (0.01)          | 1.52 (0.01)         |                                                       |                                                      |  |  |
|                  | 0.90                                       |                       |                                                             | 0.03          | 0.88                | 0.88 (0.01)          | 1.99 (0.01)         |                                                       |                                                      |  |  |
| $\beta_{tx} = 7$ | 0.20                                       |                       |                                                             | -0.04         | 1.34                | 0.88 (0.01)          | 3.03 (0.02)         |                                                       |                                                      |  |  |
|                  | 0.90                                       |                       |                                                             | -0.06         | 1.75                | 0.88 (0.01)          | 3.97 (0.02)         |                                                       |                                                      |  |  |
| $\tau = 8$       | 0.20                                       |                       |                                                             | 0.00          | 0.05                | 0.88 (0.01)          | 0.12 (< 0.01)       |                                                       |                                                      |  |  |
|                  | 0.90                                       |                       |                                                             | 0.00          | 0.05                | 0.88 (0.01)          | 0.12 (< 0.01)       |                                                       |                                                      |  |  |
| (c)              | $\cos(2\pi t) + \beta_x X + \tau Z$        | $f(t) = \cos(2\pi t)$ | 0.20                                                        | 0.00          | 0.25                | 0.88 (0.01)          | 0.56 (< 0.01)       | 0.87 (0.02)                                           | 0.84 (< 0.01)                                        |  |  |
|                  |                                            |                       | 0.90                                                        | 0.00          | 0.32                | 0.88 (0.01)          | 0.73 (< 0.01)       | 0.87 (0.01)                                           | 1.09 (< 0.01)                                        |  |  |
|                  |                                            | $\beta_x = 3$         | 0.20                                                        | 0.00          | 0.05                | 0.88 (0.01)          | 0.12 (< 0.01)       |                                                       |                                                      |  |  |
|                  |                                            |                       | 0.90                                                        | 0.00          | 0.05                | 0.89 (0.01)          | 0.12 (< 0.01)       |                                                       |                                                      |  |  |
|                  |                                            | $\tau = 8$            | 0.20                                                        | 0.00          | 0.05                | 0.88 (0.01)          | 0.12 (< 0.01)       |                                                       |                                                      |  |  |
|                  |                                            |                       | 0.90                                                        | 0.00          | 0.05                | 0.88 (0.01)          | 0.12 (< 0.01)       |                                                       |                                                      |  |  |
| (d)              | $\cos(2\pi t) + 4((X/4) - t)^3 + \tau Z$   | $\mu_4(t, X)$         | 0.20                                                        | 0.00          | 0.64                | 0.87 (< 0.01)        | 1.44 (0.01)         | 0.81 (0.02)                                           | 3.16 (0.01)                                          |  |  |
|                  |                                            |                       | 0.90                                                        | 0.00          | 0.84                | 0.87 (< 0.01)        | 1.89 (0.02)         | 0.81 (0.02)                                           | 4.17 (0.01)                                          |  |  |
|                  |                                            | $\tau = 8$            | 0.20                                                        | 0.00          | 0.05                | 0.89 (0.01)          | 0.12 (< 0.01)       |                                                       |                                                      |  |  |
|                  |                                            |                       | 0.90                                                        | 0.00          | 0.05                | 0.88 (0.01)          | 0.12 (< 0.01)       |                                                       |                                                      |  |  |

Standard errors are presented in parentheses.

Table S8. Simulation results for 95% confidence bands based on the bootstrap of subject-level observations when the *correct* mean structure is fitted; results are based on 500 MC samples.

| Case             | True Mean Function                         | Parameter     | $\rho$                                                      | Bias                  | $\sqrt{\text{var}}$ | ACP <sup>point</sup> | AL <sup>point</sup> | ACP <sup>joint</sup> <sub><math>\mu(t,X)</math></sub> | AL <sup>joint</sup> <sub><math>\mu(t,X)</math></sub> |             |               |
|------------------|--------------------------------------------|---------------|-------------------------------------------------------------|-----------------------|---------------------|----------------------|---------------------|-------------------------------------------------------|------------------------------------------------------|-------------|---------------|
| (a)              | $\beta_0 + \beta_t t + \beta_x X + \tau Z$ | $\beta_0 = 5$ | 0.20                                                        | 0.00                  | 0.20                | 0.94 (0.01)          | 0.54 (< 0.01)       |                                                       |                                                      |             |               |
|                  |                                            |               | 0.90                                                        | -0.01                 | 0.27                | 0.94 (0.01)          | 0.70 (< 0.01)       |                                                       |                                                      |             |               |
|                  |                                            | $\beta_t = 2$ | 0.20                                                        | 0.01                  | 0.40                | 0.94 (0.01)          | 1.06 (< 0.01)       |                                                       |                                                      |             |               |
|                  |                                            |               | 0.90                                                        | 0.01                  | 0.52                | 0.94 (0.01)          | 1.39 (0.01)         |                                                       |                                                      |             |               |
|                  |                                            | $\beta_x = 3$ | 0.20                                                        | 0.00                  | 0.05                | 0.95 (0.01)          | 0.14 (< 0.01)       |                                                       |                                                      |             |               |
|                  |                                            |               | 0.90                                                        | 0.00                  | 0.05                | 0.94 (0.01)          | 0.14 (< 0.01)       |                                                       |                                                      |             |               |
|                  |                                            | $\tau = 8$    | 0.20                                                        | 0.00                  | 0.05                | 0.92 (0.01)          | 0.14 (< 0.01)       |                                                       |                                                      |             |               |
|                  |                                            |               | 0.90                                                        | 0.00                  | 0.05                | 0.93 (0.01)          | 0.14 (< 0.01)       |                                                       |                                                      |             |               |
|                  |                                            | (b)           | $\beta_0 + \beta_t t + \beta_x X + \beta_{tx} t X + \tau Z$ | $\beta_0 = 5$         | 0.20                | -0.01                | 0.39                | 0.93 (0.01)                                           | 1.05 (0.01)                                          |             |               |
|                  |                                            |               |                                                             |                       | 0.90                | -0.02                | 0.51                | 0.92 (0.01)                                           | 1.38 (0.01)                                          |             |               |
|                  |                                            |               |                                                             | $\beta_t = 2$         | 0.20                | 0.03                 | 0.78                | 0.93 (0.01)                                           | 2.09 (0.01)                                          |             |               |
|                  |                                            |               |                                                             |                       | 0.90                | 0.04                 | 1.02                | 0.93 (0.01)                                           | 2.74 (0.02)                                          |             |               |
| $\beta_x = 3$    | 0.20                                       |               |                                                             | 0.02                  | 0.67                | 0.92 (0.01)          | 1.81 (0.01)         |                                                       |                                                      |             |               |
|                  | 0.90                                       |               |                                                             | 0.03                  | 0.88                | 0.93 (0.01)          | 2.36 (0.01)         |                                                       |                                                      |             |               |
| $\beta_{tx} = 7$ | 0.20                                       |               |                                                             | -0.04                 | 1.34                | 0.93 (0.01)          | 3.60 (0.02)         |                                                       |                                                      |             |               |
|                  | 0.90                                       |               |                                                             | -0.06                 | 1.75                | 0.94 (0.01)          | 4.72 (0.02)         |                                                       |                                                      |             |               |
| $\tau = 8$       | 0.20                                       |               |                                                             | 0.00                  | 0.05                | 0.92 (0.01)          | 0.14 (< 0.01)       |                                                       |                                                      |             |               |
|                  | 0.90                                       |               |                                                             | 0.00                  | 0.05                | 0.93 (0.01)          | 0.14 (< 0.01)       |                                                       |                                                      |             |               |
| (c)              | $\cos(2\pi t) + \beta_x X + \tau Z$        |               |                                                             | $f(t) = \cos(2\pi t)$ | 0.20                | 0.00                 | 0.25                | 0.93 (0.01)                                           | 0.67 (< 0.01)                                        | 0.92 (0.01) | 0.95 (< 0.01) |
|                  |                                            |               |                                                             |                       | 0.90                | 0.00                 | 0.32                | 0.93 (0.01)                                           | 0.87 (< 0.01)                                        | 0.93 (0.01) | 1.23 (< 0.01) |
|                  |                                            | $\beta_x = 3$ | 0.20                                                        | 0.00                  | 0.05                | 0.95 (0.01)          | 0.14 (< 0.01)       |                                                       |                                                      |             |               |
|                  |                                            |               | 0.90                                                        | 0.00                  | 0.05                | 0.94 (0.01)          | 0.14 (< 0.01)       |                                                       |                                                      |             |               |
|                  |                                            | $\tau = 8$    | 0.20                                                        | 0.00                  | 0.05                | 0.92 (0.01)          | 0.14 (< 0.01)       |                                                       |                                                      |             |               |
|                  |                                            |               | 0.90                                                        | 0.00                  | 0.05                | 0.93 (0.01)          | 0.14 (< 0.01)       |                                                       |                                                      |             |               |
|                  |                                            | (d)           | $\cos(2\pi t) + 4((X/4) - t)^3 + \tau Z$                    | $\mu_4(t, X)$         | 0.20                | 0.00                 | 0.64                | 0.93 (< 0.01)                                         | 1.72 (0.02)                                          | 0.89 (0.01) | 3.41 (0.01)   |
|                  |                                            |               |                                                             |                       | 0.90                | 0.00                 | 0.84                | 0.93 (< 0.01)                                         | 2.26 (0.02)                                          | 0.89 (0.01) | 3.41 (0.01)   |
|                  |                                            |               |                                                             | $\tau = 8$            | 0.20                | 0.00                 | 0.05                | 0.95 (0.01)                                           | 0.15 (< 0.01)                                        |             |               |
|                  |                                            |               |                                                             |                       | 0.90                | 0.00                 | 0.05                | 0.93 (0.01)                                           | 0.14 (< 0.01)                                        |             |               |

Standard errors are presented in parentheses.

Table S9. Simulation results for confidence bands with different nominal coverages based on the bootstrap of subject-level observations when the *correct* mean structure is fitted and when the covariate is time-varying, i.e.  $X_{ij}$ ; results are based on 500 MC samples.

| Nominal Coverage | Case | True Mean Function                       | Parameter     | $\rho$ | ACP <sup>joint</sup> <sub><math>\mu(t,X)</math></sub> | AL <sup>joint</sup> <sub><math>\mu(t,X)</math></sub> |
|------------------|------|------------------------------------------|---------------|--------|-------------------------------------------------------|------------------------------------------------------|
| 85%              | (d)  | $\cos(2\pi t) + 4((X/4) - t)^3 + \tau Z$ | $\mu_4(t, X)$ | 0.20   | 0.82 (0.02)                                           | 1.96 (< 0.01)                                        |
|                  |      |                                          |               | 0.90   | 0.80 (0.02)                                           | 2.13 (< 0.01)                                        |
| 90%              |      |                                          |               | 0.20   | 0.86 (0.02)                                           | 2.07 (< 0.01)                                        |
|                  |      |                                          |               | 0.90   | 0.87 (0.02)                                           | 2.25 (0.01)                                          |
| 95%              |      |                                          |               | 0.20   | 0.93 (0.02)                                           | 2.23 (< 0.01)                                        |
|                  |      |                                          |               | 0.90   | 0.93 (0.01)                                           | 2.42 (0.01)                                          |

Standard errors are presented in parentheses.



SECTION D. RESULTS FOR THE CASE OF HAVING NON-NORMAL ERRORS

We conduct additional simulation study to assess robustness of the proposed inferential methods to non-Gaussianity. Recall that  $w_{ij}(t)$  is white noises in the error term,  $\epsilon_{ij}(t) = \sum_{l=1}^3 \xi_{ijl} \phi_l(t) + w_{ij}(t)$ , defined in Section 6. Here we consider two non-Gaussian distributions to generate  $w_{ij}(t)$ : namely, (1) t-distribution with degrees of freedom,  $df \approx 2.46$ , and (2) skew normal distribution with mean zero, variance  $\sigma^2 = 5.33$ , and skewness parameter  $\zeta = 50$  (?). Skew normal random variables were generated using the `fGarch` package (?) in R (?). True values of the parameters,  $df$  and  $\sigma^2$ , are determined such that signal to noise remains to be 1. Nomal, skew normal, and t distributions used to generate white noises are shown in S5. The results are similar to the Gaussian case and suggest that the proposed methods are robust to non-Gaussian error distribution.

Table S10. Simulation results for 85% confidence bands based on the bootstrap of subject-level residuals when the *correct* mean structure is fitted and when errors are *non-Gaussian*; results are based on 500 MC samples.

| t-distribution |                                          |                       |        |                      |         |                     |         |                                                       |        |                                                      |         |
|----------------|------------------------------------------|-----------------------|--------|----------------------|---------|---------------------|---------|-------------------------------------------------------|--------|------------------------------------------------------|---------|
| Case           | True Mean Function                       | Parameter             | $\rho$ | ACP <sup>point</sup> |         | AL <sup>point</sup> |         | ACP <sup>joint</sup> <sub><math>\mu(t,X)</math></sub> |        | AL <sup>joint</sup> <sub><math>\mu(t,X)</math></sub> |         |
| (c)            | $\cos(2\pi t) + \beta_x X + \tau Z$      | $f(t) = \cos(2\pi t)$ | 0.20   | 0.82                 | (0.01)  | 0.49                | (<0.01) | 0.81                                                  | (0.02) | 0.77                                                 | (<0.01) |
|                |                                          |                       | 0.90   | 0.82                 | (0.01)  | 0.64                | (<0.01) | 0.81                                                  | (0.02) | 1.00                                                 | (<0.01) |
|                |                                          | $\beta_x = 3$         | 0.20   | 0.83                 | (0.02)  | 0.10                | (<0.01) |                                                       |        |                                                      |         |
|                |                                          |                       | 0.90   | 0.83                 | (0.02)  | 0.10                | (<0.01) |                                                       |        |                                                      |         |
|                |                                          | $\tau = 8$            | 0.20   | 0.85                 | (0.02)  | 0.10                | (<0.01) |                                                       |        |                                                      |         |
|                |                                          |                       | 0.90   | 0.85                 | (0.02)  | 0.10                | (<0.01) |                                                       |        |                                                      |         |
| (d)            | $\cos(2\pi t) + 4((X/4) - t)^3 + \tau Z$ | $\mu_4(t, X)$         | 0.20   | 0.83                 | (<0.01) | 1.22                | (<0.01) | 0.90                                                  | (0.01) | 3.10                                                 | (0.01)  |
|                |                                          |                       | 0.90   | 0.83                 | (<0.01) | 1.61                | (<0.01) | 0.88                                                  | (0.01) | 4.10                                                 | (0.01)  |
|                |                                          | $\tau = 8$            | 0.20   | 0.83                 | (0.08)  | 0.10                | (<0.01) |                                                       |        |                                                      |         |
|                |                                          |                       | 0.90   | 0.83                 | (0.08)  | 0.10                | (<0.01) |                                                       |        |                                                      |         |

  

| skew-normal distribution |                                          |                       |        |                      |         |                     |         |                      |        |                     |         |
|--------------------------|------------------------------------------|-----------------------|--------|----------------------|---------|---------------------|---------|----------------------|--------|---------------------|---------|
| Case                     | True Mean Function                       | Parameter             | $\rho$ | ACP <sup>point</sup> |         | AL <sup>point</sup> |         | ACP <sup>joint</sup> |        | AL <sup>joint</sup> |         |
| (c)                      | $\cos(2\pi t) + \beta_x X + \tau Z$      | $f(t) = \cos(2\pi t)$ | 0.20   | 0.84                 | (0.01)  | 0.49                | (<0.01) | 0.83                 | (0.02) | 0.77                | (<0.01) |
|                          |                                          |                       | 0.90   | 0.84                 | (0.01)  | 0.64                | (<0.01) | 0.83                 | (0.02) | 1.00                | (<0.01) |
|                          |                                          | $\beta_x = 3$         | 0.20   | 0.83                 | (0.02)  | 0.10                | (<0.01) |                      |        |                     |         |
|                          |                                          |                       | 0.90   | 0.84                 | (0.02)  | 0.10                | (<0.01) |                      |        |                     |         |
|                          |                                          | $\tau = 8$            | 0.20   | 0.86                 | (0.02)  | 0.10                | (<0.01) |                      |        |                     |         |
|                          |                                          |                       | 0.90   | 0.85                 | (0.02)  | 0.10                | (<0.01) |                      |        |                     |         |
| (d)                      | $\cos(2\pi t) + 4((X/4) - t)^3 + \tau Z$ | $\mu_4(t, X)$         | 0.20   | 0.83                 | (<0.01) | 1.23                | (<0.01) | 0.89                 | (0.01) | 3.11                | (0.01)  |
|                          |                                          |                       | 0.90   | 0.83                 | (<0.01) | 1.61                | (<0.01) | 0.89                 | (0.01) | 4.09                | (0.01)  |
|                          |                                          | $\tau = 8$            | 0.20   | 0.84                 | (0.08)  | 0.10                | (<0.01) |                      |        |                     |         |
|                          |                                          |                       | 0.90   | 0.85                 | (0.08)  | 0.10                | (<0.01) |                      |        |                     |         |

Standard errors are presented in parentheses.

Table S11. Simulation results for 90% confidence bands based on the bootstrap of subject-level residuals when the *correct* mean structure is fitted and when errors are *non-Gaussian*; results are based on 500 MC samples.

| t-distribution           |                                          |                       |               |                      |         |                     |         |                                                       |         |                                                      |         |  |
|--------------------------|------------------------------------------|-----------------------|---------------|----------------------|---------|---------------------|---------|-------------------------------------------------------|---------|------------------------------------------------------|---------|--|
| Case                     | True Mean Function                       | Parameter             | $\rho$        | ACP <sup>point</sup> |         | AL <sup>point</sup> |         | ACP <sup>joint</sup> <sub><math>\mu(t,X)</math></sub> |         | AL <sup>joint</sup> <sub><math>\mu(t,X)</math></sub> |         |  |
| (c)                      | $\cos(2\pi t) + \beta_x X + \tau Z$      | $f(t) = \cos(2\pi t)$ | 0.20          | 0.87                 | (0.01)  | 0.55                | (<0.01) | 0.87                                                  | (0.01)  | 0.84                                                 | (<0.01) |  |
|                          |                                          |                       | 0.90          | 0.87                 | (0.01)  | 0.73                | (<0.01) | 0.87                                                  | (0.02)  | 1.09                                                 | (<0.01) |  |
|                          |                                          |                       | $\beta_x = 3$ | 0.20                 | 0.89    | (0.01)              | 0.11    | (<0.01)                                               |         |                                                      |         |  |
|                          |                                          |                       |               | 0.90                 | 0.88    | (0.01)              | 0.11    | (<0.01)                                               |         |                                                      |         |  |
|                          |                                          |                       |               | $\tau = 8$           | 0.20    | 0.90                | (0.01)  | 0.11                                                  | (<0.01) |                                                      |         |  |
| 0.90                     | 0.89                                     | (0.01)                | 0.12          | (<0.01)              |         |                     |         |                                                       |         |                                                      |         |  |
| (d)                      | $\cos(2\pi t) + 4((X/4) - t)^3 + \tau Z$ | $\mu_4(t, X)$         | 0.20          | 0.88                 | (<0.01) | 1.40                | (<0.01) | 0.93                                                  | (0.01)  | 3.23                                                 | (0.01)  |  |
|                          |                                          |                       | 0.90          | 0.88                 | (<0.01) | 1.84                | (<0.01) | 0.92                                                  | (0.01)  | 4.27                                                 | (0.01)  |  |
|                          |                                          |                       | $\tau = 8$    | 0.20                 | 0.90    | (0.06)              | 0.11    | (<0.01)                                               |         |                                                      |         |  |
|                          |                                          |                       |               | 0.90                 | 0.90    | (0.06)              | 0.11    | (<0.01)                                               |         |                                                      |         |  |
|                          |                                          |                       |               | 0.90                 | 0.90    | (0.06)              | 0.11    | (<0.01)                                               |         |                                                      |         |  |
| skew-normal distribution |                                          |                       |               |                      |         |                     |         |                                                       |         |                                                      |         |  |
| Case                     | True Mean Function                       | Parameter             | $\rho$        | ACP <sup>point</sup> |         | AL <sup>point</sup> |         | ACP <sup>joint</sup> <sub><math>\mu(t,X)</math></sub> |         | AL <sup>joint</sup> <sub><math>\mu(t,X)</math></sub> |         |  |
| (c)                      | $\cos(2\pi t) + \beta_x X + \tau Z$      | $f(t) = \cos(2\pi t)$ | 0.20          | 0.89                 | (0.01)  | 0.56                | (<0.01) | 0.88                                                  | (0.01)  | 0.84                                                 | (<0.01) |  |
|                          |                                          |                       | 0.90          | 0.88                 | (0.01)  | 0.73                | (<0.01) | 0.87                                                  | (0.01)  | 1.09                                                 | (<0.01) |  |
|                          |                                          |                       | $\beta_x = 3$ | 0.20                 | 0.89    | (0.01)              | 0.12    | (<0.01)                                               |         |                                                      |         |  |
|                          |                                          |                       |               | 0.90                 | 0.89    | (0.01)              | 0.12    | (<0.01)                                               |         |                                                      |         |  |
|                          |                                          |                       |               | $\tau = 8$           | 0.20    | 0.90                | (0.01)  | 0.12                                                  | (<0.01) |                                                      |         |  |
| 0.90                     | 0.91                                     | (0.01)                | 0.12          | (<0.01)              |         |                     |         |                                                       |         |                                                      |         |  |
| (d)                      | $\cos(2\pi t) + 4((X/4) - t)^3 + \tau Z$ | $\mu_4(t, X)$         | 0.20          | 0.88                 | (<0.01) | 1.40                | (<0.01) | 0.92                                                  | (0.01)  | 3.24                                                 | (0.01)  |  |
|                          |                                          |                       | 0.90          | 0.88                 | (<0.01) | 1.84                | (<0.01) | 0.91                                                  | (0.01)  | 4.26                                                 | (0.01)  |  |
|                          |                                          |                       | $\tau = 8$    | 0.20                 | 0.89    | (0.07)              | 0.12    | (<0.01)                                               |         |                                                      |         |  |
|                          |                                          |                       |               | 0.90                 | 0.89    | (0.07)              | 0.12    | (<0.01)                                               |         |                                                      |         |  |
|                          |                                          |                       |               | 0.90                 | 0.89    | (0.07)              | 0.12    | (<0.01)                                               |         |                                                      |         |  |

Standard errors are presented in parentheses.

Table S12. Simulation results for 95% confidence bands based on the bootstrap of subject-level residuals when the *correct* mean structure is fitted and when errors are *non-Gaussian*; results are based on 500 MC samples.

| t-distribution           |                                          |                       |               |                      |         |                     |         |                                                       |         |                                                      |         |  |
|--------------------------|------------------------------------------|-----------------------|---------------|----------------------|---------|---------------------|---------|-------------------------------------------------------|---------|------------------------------------------------------|---------|--|
| Case                     | True Mean Function                       | Parameter             | $\rho$        | ACP <sup>point</sup> |         | AL <sup>point</sup> |         | ACP <sup>joint</sup> <sub><math>\mu(t,X)</math></sub> |         | AL <sup>joint</sup> <sub><math>\mu(t,X)</math></sub> |         |  |
| (c)                      | $\cos(2\pi t) + \beta_x X + \tau Z$      | $f(t) = \cos(2\pi t)$ | 0.20          | 0.93                 | (0.01)  | 0.66                | (<0.01) | 0.93                                                  | (0.01)  | 0.94                                                 | (<0.01) |  |
|                          |                                          |                       | 0.90          | 0.93                 | (0.01)  | 0.86                | (<0.01) | 0.93                                                  | (0.01)  | 1.22                                                 | (<0.01) |  |
|                          |                                          |                       | $\beta_x = 3$ | 0.20                 | 0.94    | (0.01)              | 0.13    | (<0.01)                                               |         |                                                      |         |  |
|                          |                                          |                       |               | 0.90                 | 0.94    | (0.01)              | 0.13    | (<0.01)                                               |         |                                                      |         |  |
|                          |                                          |                       |               | $\tau = 8$           | 0.20    | 0.94                | (0.01)  | 0.14                                                  | (<0.01) |                                                      |         |  |
| 0.90                     | 0.94                                     | (0.01)                | 0.14          | (<0.01)              |         |                     |         |                                                       |         |                                                      |         |  |
| (d)                      | $\cos(2\pi t) + 4((X/4) - t)^3 + \tau Z$ | $\mu_4(t, X)$         | 0.20          | 0.94                 | (<0.01) | 1.66                | (<0.01) | 0.96                                                  | (0.01)  | 3.44                                                 | (0.01)  |  |
|                          |                                          |                       | 0.90          | 0.93                 | (<0.01) | 2.18                | (<0.01) | 0.96                                                  | (0.01)  | 4.53                                                 | (0.01)  |  |
|                          |                                          |                       | $\tau = 8$    | 0.20                 | 0.93    | (0.05)              | 0.13    | (<0.01)                                               |         |                                                      |         |  |
|                          |                                          |                       |               | 0.90                 | 0.93    | (0.05)              | 0.14    | (<0.01)                                               |         |                                                      |         |  |
|                          |                                          |                       |               | 0.90                 | 0.94    | (0.05)              | 0.14    | (<0.01)                                               |         |                                                      |         |  |
| skew-normal distribution |                                          |                       |               |                      |         |                     |         |                                                       |         |                                                      |         |  |
| Case                     | True Mean Function                       | Parameter             | $\rho$        | ACP <sup>point</sup> |         | AL <sup>point</sup> |         | ACP <sup>joint</sup>                                  |         | AL <sup>joint</sup>                                  |         |  |
| (c)                      | $\cos(2\pi t) + \beta_x X + \tau Z$      | $f(t) = \cos(2\pi t)$ | 0.20          | 0.94                 | (0.01)  | 0.66                | (<0.01) | 0.93                                                  | (0.01)  | 0.95                                                 | (<0.01) |  |
|                          |                                          |                       | 0.90          | 0.94                 | (0.01)  | 0.86                | (<0.01) | 0.94                                                  | (0.01)  | 1.23                                                 | (<0.01) |  |
|                          |                                          |                       | $\beta_x = 3$ | 0.20                 | 0.94    | (0.01)              | 0.14    | (<0.01)                                               |         |                                                      |         |  |
|                          |                                          |                       |               | 0.90                 | 0.94    | (0.01)              | 0.14    | (<0.01)                                               |         |                                                      |         |  |
|                          |                                          |                       |               | $\tau = 8$           | 0.20    | 0.95                | (0.01)  | 0.14                                                  | (<0.01) |                                                      |         |  |
| 0.90                     | 0.95                                     | (0.01)                | 0.14          | (<0.01)              |         |                     |         |                                                       |         |                                                      |         |  |
| (d)                      | $\cos(2\pi t) + 4((X/4) - t)^3 + \tau Z$ | $\mu_4(t, X)$         | 0.20          | 0.93                 | (<0.01) | 1.66                | (<0.01) | 0.96                                                  | (0.01)  | 3.44                                                 | (0.01)  |  |
|                          |                                          |                       | 0.90          | 0.93                 | (<0.01) | 2.18                | (0.01)  | 0.94                                                  | (0.01)  | 4.53                                                 | (0.01)  |  |
|                          |                                          |                       | $\tau = 8$    | 0.20                 | 0.94    | (0.05)              | 0.14    | (<0.01)                                               |         |                                                      |         |  |
|                          |                                          |                       |               | 0.90                 | 0.94    | (0.05)              | 0.14    | (<0.01)                                               |         |                                                      |         |  |
|                          |                                          |                       |               | 0.90                 | 0.94    | (0.05)              | 0.14    | (<0.01)                                               |         |                                                      |         |  |

Standard errors are presented in parentheses.

Table S13. Empirical Type I error of the test statistic  $T$  based on the  $N_{sim} = 1000$  MC samples for the case of having non-Gaussian errors.

|           |              | <b>t-distribution</b>                |        |                 |        |                 |        |
|-----------|--------------|--------------------------------------|--------|-----------------|--------|-----------------|--------|
|           |              | $\mu(t, x) = \cos(2\pi t), \tau = 8$ |        |                 |        |                 |        |
|           |              | $\alpha = 0.05$                      |        | $\alpha = 0.10$ |        | $\alpha = 0.15$ |        |
| $n = 100$ | $\rho = 0.2$ | 0.08                                 | (0.01) | 0.15            | (0.01) | 0.21            | (0.01) |
| $n = 200$ | $\rho = 0.2$ | 0.07                                 | (0.01) | 0.13            | (0.01) | 0.19            | (0.01) |
| $n = 300$ | $\rho = 0.2$ | 0.07                                 | (0.01) | 0.12            | (0.01) | 0.17            | (0.01) |
|           |              | <b>skew normal distribution</b>      |        |                 |        |                 |        |
|           |              | $\mu(t, x) = \cos(2\pi t), \tau = 8$ |        |                 |        |                 |        |
|           |              | $\alpha = 0.05$                      |        | $\alpha = 0.10$ |        | $\alpha = 0.15$ |        |
| $n = 100$ | $\rho = 0.2$ | 0.09                                 | (0.01) | 0.15            | (0.01) | 0.22            | (0.01) |
| $n = 200$ | $\rho = 0.2$ | 0.05                                 | (0.01) | 0.09            | (0.01) | 0.14            | (0.01) |
| $n = 300$ | $\rho = 0.2$ | 0.06                                 | (0.01) | 0.11            | (0.01) | 0.16            | (0.01) |

Standard errors are presented in parentheses.

## SECTION E. ADDITIONAL FIGURES

Additional figures discussed in the main paper are presented in this section.

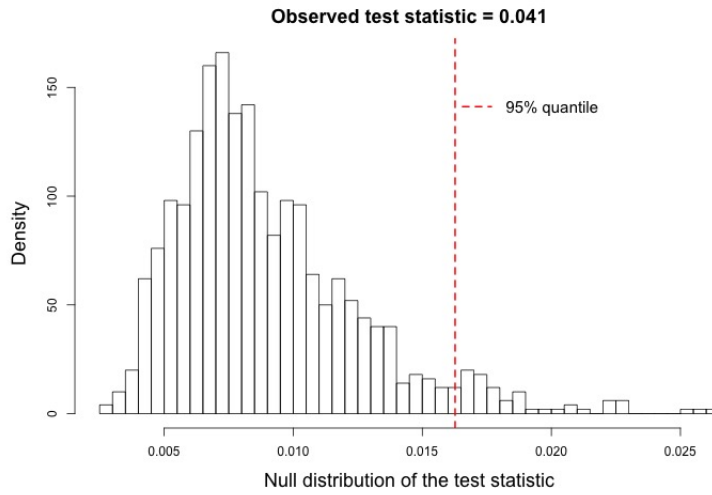

Figure S1. The null distribution of the test statistic in (4.4) for the null hypothesis that there is no effect of age on activity. The red dashed line is the 95 percent quantile of the null distribution of the test statistic.

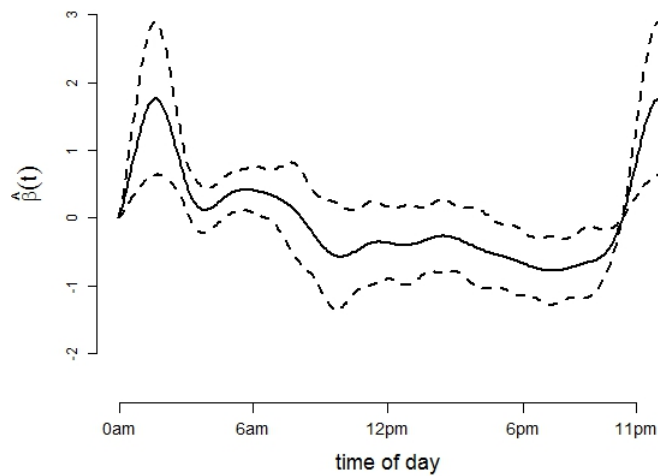

Figure S2. Association of body mass index with mean log counts as a function of time of day and the associated joint confidence bands.

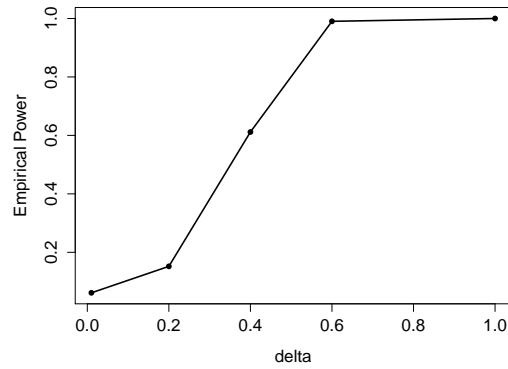

Figure S3. Estimated power curves for testing  $H_0 : \mu(t, x) = \eta(t)$  using  $\alpha = 0.05$ , when the true mean function  $\mu(t, x) = \cos(2\pi t) + \delta(\hat{\mu}(t, x) - \cos(2\pi t))$  for  $\delta = 0.01, 2, 4, 6, 8$ . Results are based on  $N_{sim} = 500$  MC samples.

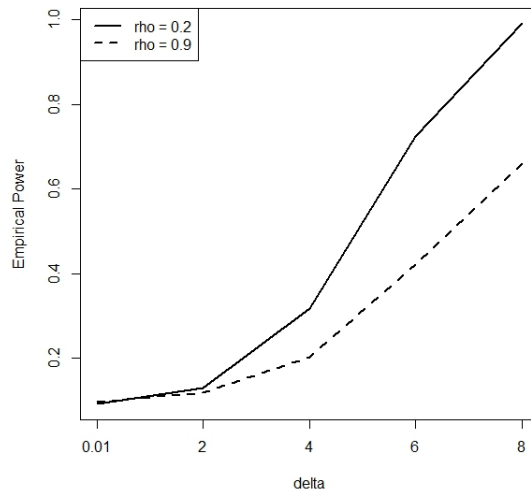

Figure S4. Estimated power curves for testing  $H_0 : \mu(t, x) = \eta(t)$  using level of significance  $\alpha = 0.05$ , when the true mean function  $\mu(t, x) = 2 \cos(2\pi t) + \delta(x/4 - t)^3$  for  $\delta = 0.01, 2, 4, 6$ . The results are based on  $N_{sim} = 500$  MC samples.

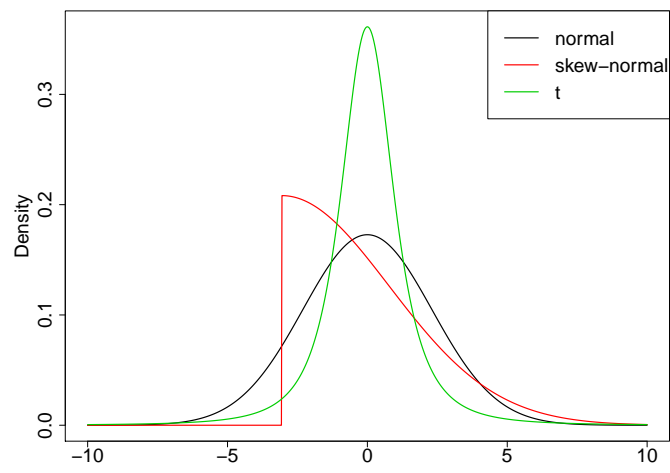

Figure S5. Normal, skew-normal, and t distributions used to generate white noises.

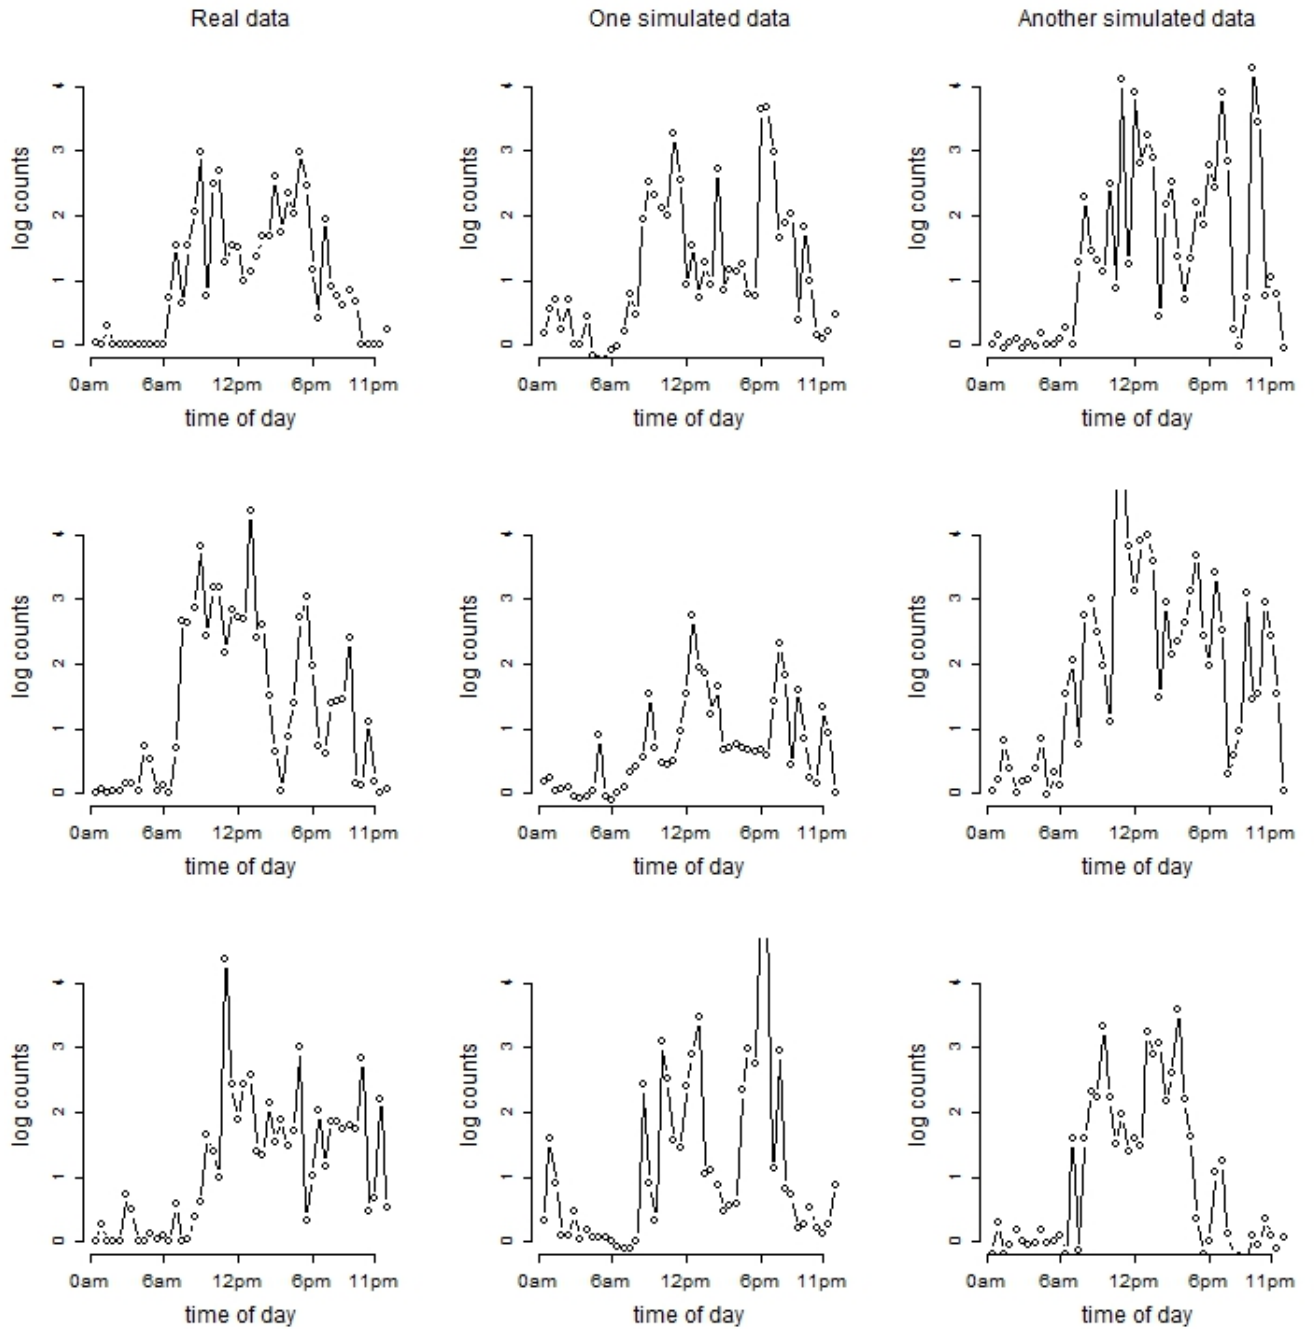

Figure S6. Three observed curves (left) from the BLSA data and the two corresponding simulated curves (middle & right) from the fitted model using the tensor product of  $d_t = 15$  and  $d_x = 7$  basis functions in  $t$  and  $x$  directions respectively.
